# Supplementary material for: Review of Grain Fortification Legislation, Standards, and Monitoring Documents
Source: PubMed Central journal article supplement (PMC6024620; doi:10.9745/ghsp-d-17-00427), 2018-06-27
Supplement: 17-00427-Marks-SupplementTable2.pdf [file 17-00427-Marks-SupplementTable2.pdf]

**SUPPLEMENT TABLE 2.** Sensitivity analysis comparing percentage of country-grain combinations\* with documented items of fortification legislation, standards, and monitoring documents by verification status (N=72)

| <b>Item</b>                                                                            | <b>Verified<br/>Reviews**<br/>(n=23)</b> | <b>Unverified<br/>Reviews**<br/>(n=49)</b> | <b>p-value<sup>^</sup></b> |
|----------------------------------------------------------------------------------------|------------------------------------------|--------------------------------------------|----------------------------|
| <i>General</i>                                                                         |                                          |                                            |                            |
| Food vehicle stated in legislation                                                     | 91%                                      | 100%                                       | 0.04                       |
| Public health objective/purpose                                                        | 74%                                      | 67%                                        | 0.58                       |
| Accepted international norms                                                           | 57%                                      | 53%                                        | 0.79                       |
| Definitions specific to fortification                                                  | 78%                                      | 76%                                        | 0.80                       |
| Repeals of prior documentation                                                         | 61%                                      | 57%                                        | 0.77                       |
| Effective date/grace period                                                            | 74%                                      | 71%                                        | 0.83                       |
| <i>Micronutrients/premix</i>                                                           |                                          |                                            |                            |
| Nutrients required                                                                     | 100%                                     | 100%                                       | 1.00                       |
| Fortificants (chemical compounds)                                                      | 91%                                      | 86%                                        | 0.51                       |
| Fortification levels                                                                   | 43%                                      | 41%                                        | 0.83                       |
| Bioavailability of fortificants                                                        | 22%                                      | 35%                                        | 0.27                       |
| Nutrient stability                                                                     | 48%                                      | 55%                                        | 0.57                       |
| <i>Costing</i>                                                                         |                                          |                                            |                            |
| Cost sharing of fortification                                                          | 26%                                      | 16%                                        | 0.34                       |
| Financial responsibility of monitoring and enforcement                                 | 43%                                      | 31%                                        | 0.29                       |
| <i>Labeling</i>                                                                        |                                          |                                            |                            |
| Labeling required                                                                      | 83%                                      | 76%                                        | 0.51                       |
| Guidance on health claims                                                              | 48%                                      | 51%                                        | 0.80                       |
| <i>Internal monitoring (conducted by industry during production)</i>                   |                                          |                                            |                            |
| Sampling process outlined                                                              | 48%                                      | 22%                                        | 0.03                       |
| Industry QA/QC justified/required                                                      | 70%                                      | 61%                                        | 0.50                       |
| Applicability of qualitative tests                                                     | 48%                                      | 20%                                        | 0.02                       |
| <i>External monitoring (conducted by government at production sites)</i>               |                                          |                                            |                            |
| External monitoring justified                                                          | 78%                                      | 57%                                        | 0.08                       |
| Protocols and systems described                                                        | 39%                                      | 31%                                        | 0.48                       |
| Roles and responsibilities clarified                                                   | 52%                                      | 27%                                        | 0.03                       |
| Timeline for inspections outlined                                                      | 35%                                      | 22%                                        | 0.27                       |
| Sampling process outlined                                                              | 52%                                      | 37%                                        | 0.22                       |
| Applicability of qualitative tests                                                     | 30%                                      | 14%                                        | 0.11                       |
| Registration requirements                                                              | 43%                                      | 35%                                        | 0.48                       |
| <i>Commercial monitoring (conducted by government at market or distribution sites)</i> |                                          |                                            |                            |
| Commercial monitoring justified                                                        | 48%                                      | 47%                                        | 0.94                       |
| Protocols and systems described                                                        | 30%                                      | 14%                                        | 0.11                       |
| Roles and responsibilities clarified                                                   | 35%                                      | 24%                                        | 0.37                       |

| <b>Item</b>                                                                 | <b>Verified<br/>Reviews**<br/>(n=23)</b> | <b>Unverified<br/>Reviews**<br/>(n=49)</b> | <b>p-value<sup>^</sup></b> |
|-----------------------------------------------------------------------------|------------------------------------------|--------------------------------------------|----------------------------|
| Timeline for inspections outlined                                           | 4%                                       | 10%                                        | 0.41                       |
| Sampling process outlined                                                   | 30%                                      | 27%                                        | 0.73                       |
| <i>Import monitoring (conducted by government at ports/points of entry)</i> |                                          |                                            |                            |
| Import monitoring justified                                                 | 70%                                      | 61%                                        | 0.50                       |
| Protocols and systems described                                             | 35%                                      | 35%                                        | 0.99                       |
| Roles and responsibilities clarified                                        | 30%                                      | 37%                                        | 0.61                       |
| Sampling process outlined                                                   | 35%                                      | 20%                                        | 0.19                       |
| <i>Enforcement/penalties</i>                                                |                                          |                                            |                            |
| Enforcement roles and responsibilities clarified                            | 83%                                      | 63%                                        | 0.10                       |
| Incentives to start fortification                                           | 22%                                      | 10%                                        | 0.19                       |
| Incentives to continue fortification                                        | 9%                                       | 10%                                        | 0.84                       |
| Penalties to compel compliance                                              | 70%                                      | 67%                                        | 0.85                       |
| Penalties objectively defined                                               | 17%                                      | 22%                                        | 0.63                       |
| Enforcement includes feedback                                               | 39%                                      | 8%                                         | 0.001                      |
| <i>Laboratory</i>                                                           |                                          |                                            |                            |
| Analytical methods identified                                               | 65%                                      | 57%                                        | 0.52                       |
| Recognition of laboratory variation                                         | 13%                                      | 10%                                        | 0.73                       |
| Quantitative analysis of "marker" micronutrients such as iron               | 52%                                      | 29%                                        | 0.05                       |
| <i>Reporting</i>                                                            |                                          |                                            |                            |
| Dissemination of monitoring results described                               | 35%                                      | 29%                                        | 0.60                       |

\*Country-grain combination refers to the unit of analysis; countries that mandate the fortification of multiple cereal grains will contribute more than one country-grain combination (e.g. Philippines-wheat and Philippines-rice).

\*\*Verified reviews=country-grain combinations where country representatives confirmed that all appropriate documentation was included in review.

<sup>^</sup>Compared using chi-square tests.
